# Supplementary material for: Distorted octahedral site occupation-induced high-efficiency broadband near-infrared emission in LiScGe2O6:Cr3+ phosphor
Source: Royal Society of Chemistry journal article supplement (doi:10.1039/d1tc03057d), 2021-01-01
Supplement: d1tc03057d1.pdf [file d1tc03057d1.pdf]

**Distorted–octahedral site–occupation induced high efficiency broadband near  
infrared emission in LiScGe<sub>2</sub>O<sub>6</sub>:Cr<sup>3+</sup> phosphor**

*X.H. Chen,<sup>ab</sup> E.H. Song,<sup>\*b</sup> Y.Y. Zhou,<sup>b</sup> F.Q. He,<sup>b</sup> J.Q. Yang,<sup>b</sup> and Q.Y. Zhang.<sup>\*b</sup>*

*<sup>a</sup> School of Intelligent Engineering, Shaoguan University, Shaoguan 512005, China*

*<sup>b</sup> State Key Laboratory of Luminescent Materials and Devices, Guangdong Provincial Key Laboratory of Fiber Materials and Applied Techniques, South China University of Technology, Guangzhou 510641, China*

Corresponding Email: [msehsong@scut.edu.cn](mailto:msehsong@scut.edu.cn); [qyzhang@scut.edu.cn](mailto:qyzhang@scut.edu.cn);

The Supporting information contains 5 pages, including 3 Figures (Figure S1, S2 and S3), 1 Table (Table S1) and Reference.

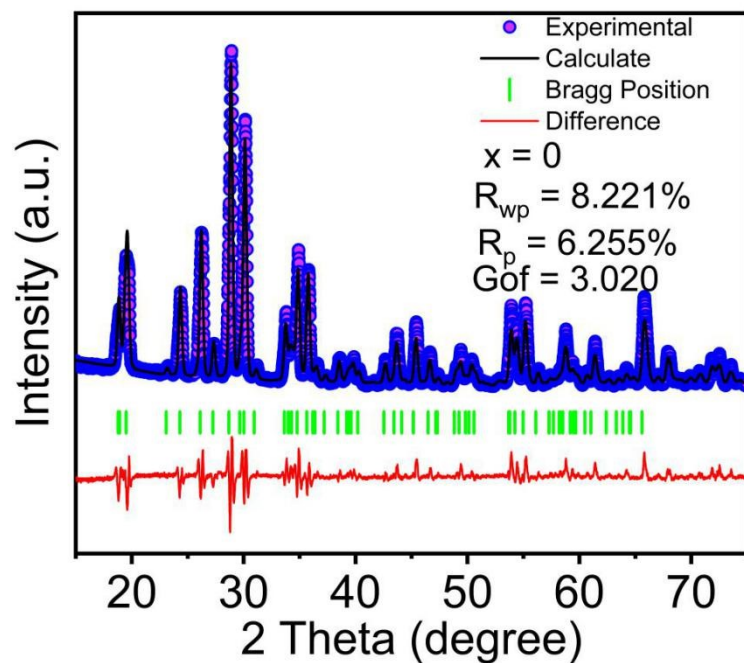

**Figure S1.** Rietveld refinement and experimental XRD pattern of  $\text{LiScGe}_2\text{O}_6$ .

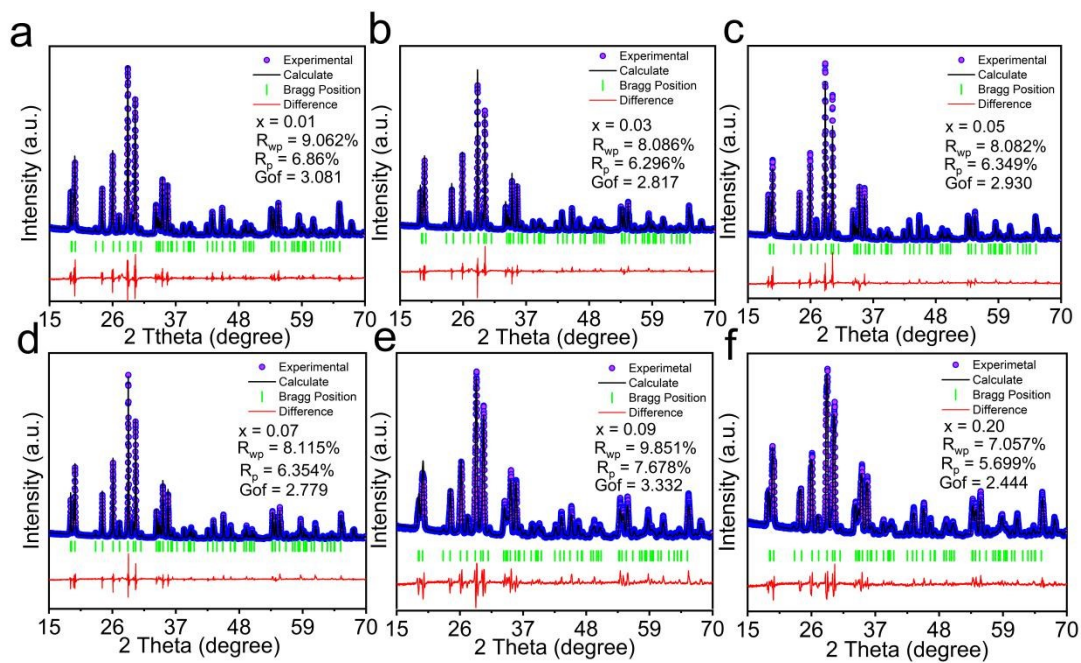

**Figure S2.** Rietveld refinement and experimental XRD patterns of  $\text{LiSc}_{1-x}\text{Ge}_2\text{O}_6:x\text{Cr}^{3+}$  ( $x = 0.01-0.2$ ).

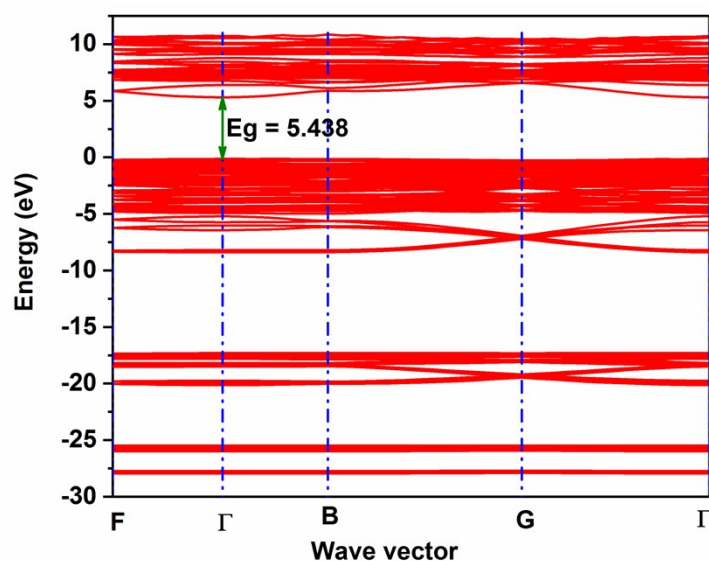

**Figure S3.** Band structure of LiScGe<sub>2</sub>O<sub>6</sub>.

**Computational Methodology:** The band structure of this compound in this study were performed using the projector augmented-wave (PAW) method [1, 2] as implemented in the Vienna ab initio simulation package (VASP) code.[3] The cutoff energy  $E_{\text{cut}}$  and k-point mesh were set as 499.034 eV and the  $1 \times 1 \times 1$  Monkhorst-Pack grid, respectively. The convergence criterion for the electronic energy was 10<sup>-5</sup> eV, whereas the structures were relaxed until the Hellmann-Feynman forces were smaller than 0.02 eV Å<sup>-1</sup>. The HSE06 hybrid functional was applied in all the calculations.[4]

**Reference:**

- [1] G.Kresse, J. Furthmüller, *Phys. Rev. B* 1999, **59**, 1758.
- [2] G. Kresse, J. Furthmüller, *Phys. Rev. B* 1996, **54**, 11169.
- [3] J. P. Perdew, K. Burke, M. Ernzerhof, *Phys. Rev. Lett.* 1996, **77**, 3865.
- [4] Y.-I. Matsushita, K. Nakamura, and A. Oshiyama, *Phys. Rev. B* 2011, **84**, 075205.

**Table S1.** Structural parameters of the  $\text{LiScGe}_2\text{O}_6:x\text{Cr}^{3+}$  ( $x = 0-0.20$ ) samples based on the Rietveld refinement of the XRD patterns.

| Parameter<br>x | a (Å)  | b (Å)  | c (Å)  | $\alpha/\gamma$ (°) | $\beta$ (°) | V (Å <sup>3</sup> ) |
|----------------|--------|--------|--------|---------------------|-------------|---------------------|
| 0              | 5.4637 | 9.1017 | 9.6890 | 90                  | 102.9345    | 469.5944            |
| 0.01           | 5.4620 | 9.0963 | 9.6863 | 90                  | 102.9452    | 469.0198            |
| 0.03           | 5.4563 | 9.0822 | 9.6776 | 90                  | 102.9564    | 467.3659            |
| 0.05           | 5.4520 | 9.0692 | 9.6700 | 90                  | 102.9654    | 465.9469            |
| 0.07           | 5.4562 | 9.0733 | 9.6786 | 90                  | 102.9716    | 466.9172            |
| 0.09           | 5.4548 | 9.0648 | 9.6771 | 90                  | 102.9784    | 466.2728            |
| 0.20           | 5.4773 | 9.0084 | 9.6473 | 90                  | 103.0239    | 460.3812            |
